# Supplementary material
Source: PubMed Central journal article supplement (PMC4317352)
Supplement: NIHMS627418-supplement-1.pdf [file NIHMS627418-supplement-1.pdf]

**SUPPLEMENTARY MATERIALS**  
**Supplementary Figures**

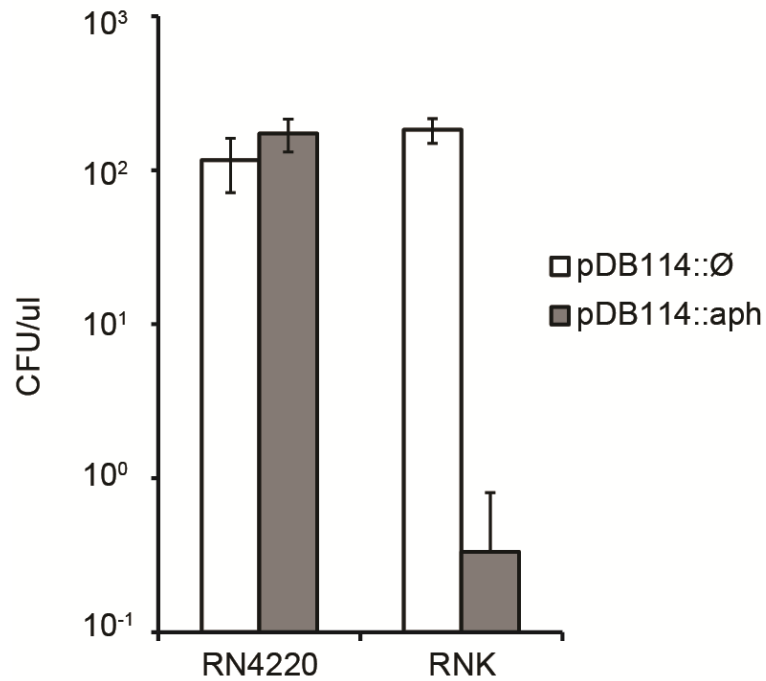

**Supplementary Figure 1.** The *S. pyogenes* CRISPR-Cas system can be programmed to kill *S. aureus*. Plasmid pDB114 carries the *S. pyogenes* tracrRNA, *cas9* and a minimal array containing two repeats separated by a sequence containing BsaI restriction sites used to clone crRNA guide sequences using annealed oligonucleotides. pDB114 was programmed to target the *aph-3* kanamycin resistance gene and transformed either in electrocompetent RN4220 cells or RNK cells carrying *aph-3* in the chromosome. Chloramphenicol resistant CFU obtained in three independent assays are reported (mean  $\pm$  s.d.).

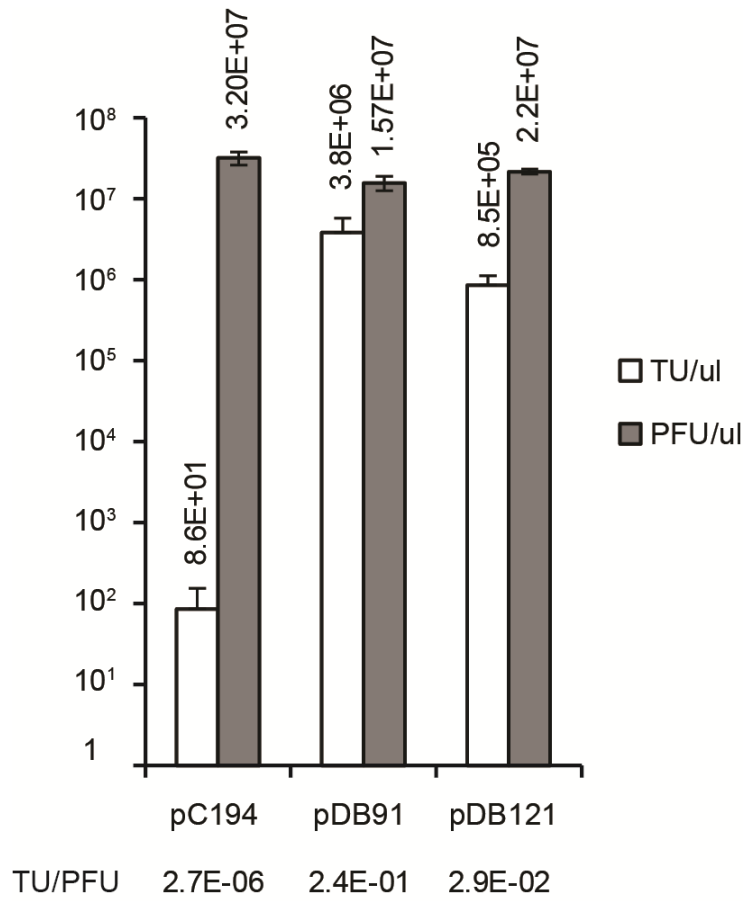

**Supplementary Figure 2.** Phagemid transduction efficiency.  $\Phi$ NM1 lysates were prepared on RN4220 cells containing either pC194, pDB91 or pDB121. PFU/ $\mu$ l and TU/ $\mu$ l were measured as described in materials and methods (mean  $\pm$  s.d.).

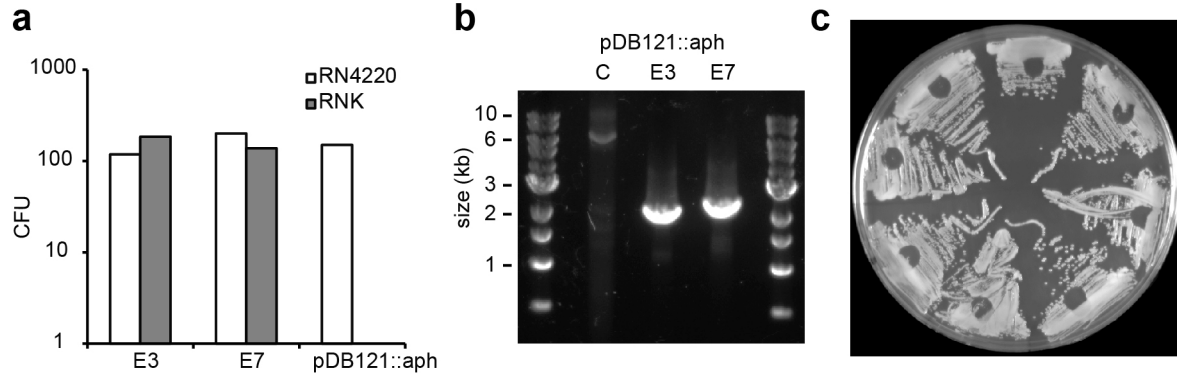

**Supplementary Figure 3.** Analysis of survivor colonies. Eight colonies of RNK<sup>ϕ</sup> that survived a treatment with pDB121::aph were re-streaked on TSA-chloramphenicol plates. Two chloramphenicol-resistant colonies were isolated, indicating that they carried the pDB121 plasmid (E3 and E7). **(a)** The plasmids from E3 and E7 were purified and retransformed in RN4220 or RNK electrocompetent cells and plated on TSA-chloramphenicol. While a control pDB121::aph plasmid did not yield any colonies when transformed in RNK, plasmids prepared from E3 and E7 could be efficiently transformed, indicating that the CRISPR system was no longer functional. **(b)** PCR amplification of the Cas9 region with primers B113 and W270 on pDB121::aph (control, C) and the E3 and E7 escapers, showing a deletion of the whole region. The expected size of the control is 7,137bp. **(c)** In order to assess the integrity of the target, the survivor colonies were streaked on a HIA containing 5 mM CaCl<sub>2</sub> plate and a drop of pDB121::aph phagemid was added on top. Clearance indicates that the isolated colonies are still sensitive; hence the target is still intact.

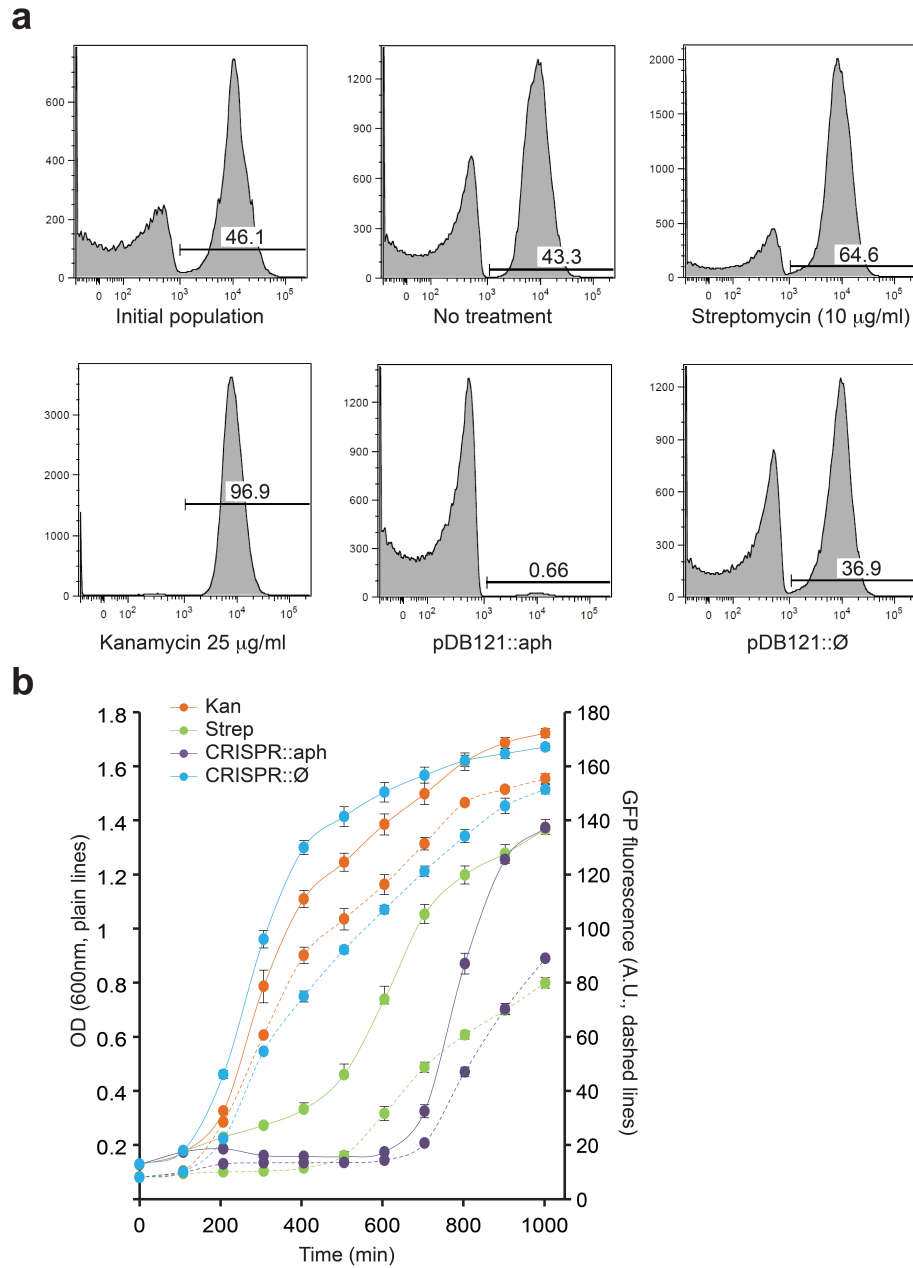

**Supplementary Figure 4.** Determination of GFP fluorescence as a measure of cell growth after phagemid or antibiotic treatment. **(a)** Flow cytometry of cells shown in Fig. 1d either before, without or with different treatments. Y-axis, GFP fluorescence in absolute units; X-axis, number of cells. **(b)** Same as Fig. 1d but using a monoculture of RNK cells.

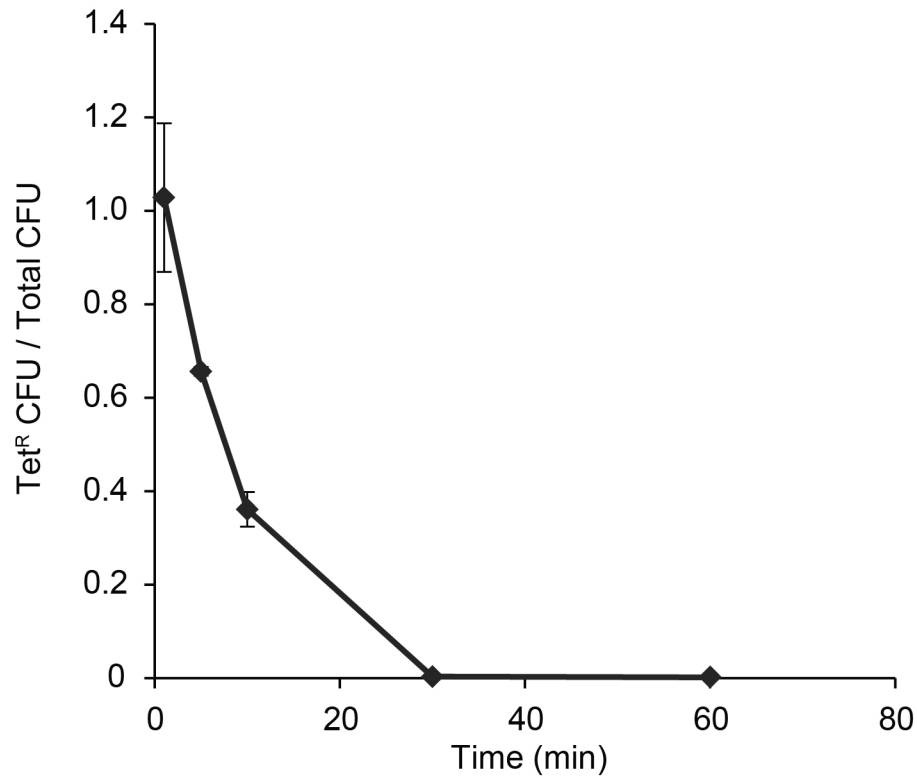

**Supplementary Figure 5.** Measurement of pUSA02-mediated tetracycline resistance after the addition of the CRISPR-Cas9 phagemid. *S. aureus* Newman cells carrying the pUSA02 plasmid were treated with phagemid pDB251, targeting the tetracycline-resistance (Tet<sup>R</sup>) gene carried by the plasmid. At different times after phagemid addition to the culture, aliquots were plated in selective and non-selective media to calculate the percentage of cells harboring the plasmid. Results indicate the average and standard deviation of three independent experiments.

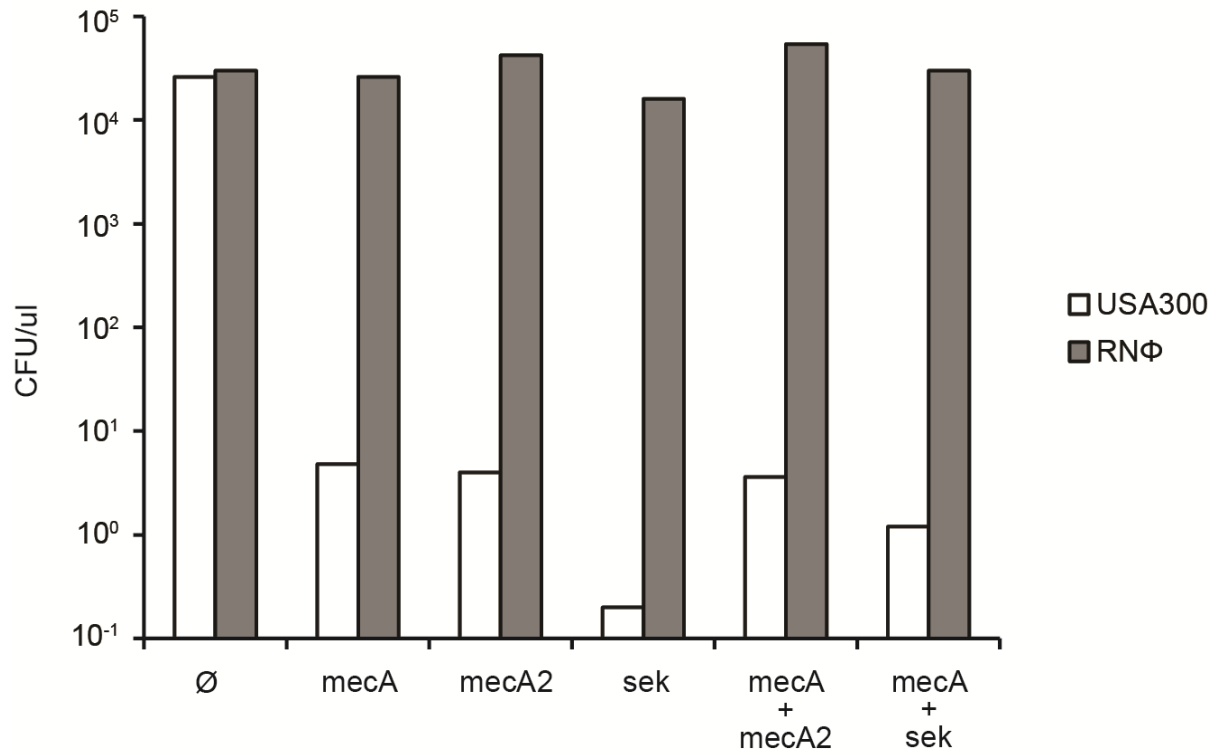

**Supplementary Figure 6.** Killing with multiple crRNA guides. Lysates of the pDB121 phagemid targeting carrying *mecA*, *mecA2* or *sek* either alone or in combination were used to infect USA300 or RNK $\Phi$  cells with a MOI of ~10. Cells were plated on non-selective TSA plates.

## Supplementary Tables

**Supplementary Table 1.** Cfu counts of data represented in Fig. 3b (three independent experiments were performed for each treatment: 1-3).

| <b>PBS</b>        | <b>Mouse #</b> | <b>GFP<br/>CFU</b> | <b>TOTAL<br/>CFU</b> | <b>GFP%</b>  |
|-------------------|----------------|--------------------|----------------------|--------------|
| <b>1</b>          | <b>17</b>      | 4.50E+05           | 1.05E+06             | 42.86        |
|                   | <b>18</b>      | 6.50E+06           | 1.50E+07             | 43.33        |
|                   | <b>19</b>      | 4.50E+07           | 1.05E+08             | 42.86        |
|                   | <b>20</b>      | 1.00E+05           | 3.50E+05             | 28.57        |
| <b>2</b>          | <b>24</b>      | 8.00E+03           | 2.15E+04             | 37.21        |
|                   | <b>25</b>      | 1.50E+04           | 5.00E+04             | 30.00        |
|                   | <b>26</b>      | 5.00E+06           | 2.40E+07             | 20.83        |
|                   | <b>27</b>      | 2.00E+05           | 9.00E+05             | 22.22        |
|                   | <b>28</b>      | 6.50E+06           | 1.50E+07             | 43.33        |
| <b>3</b>          | <b>20</b>      | 1.50E+05           | 4.00E+05             | 37.50        |
|                   | <b>21</b>      | 5.00E+04           | 3.00E+05             | 16.67        |
|                   | <b>22</b>      | 2.00E+05           | 6.50E+05             | 30.77        |
|                   | <b>23</b>      | 2.00E+04           | 9.50E+04             | 21.05        |
|                   | <b>24</b>      | 5.00E+05           | 2.50E+06             | 20.00        |
|                   | <b>25</b>      | 1.00E+04           | 2.50E+04             | 40.00        |
|                   | <b>Mean</b>    | <b>4.31E+06</b>    | <b>1.10E+07</b>      | <b>31.81</b> |
|                   | <b>SD</b>      | <b>1.15E+07</b>    | <b>2.70E+07</b>      | <b>9.82</b>  |
| <b>ΦNM1</b>       | <b>Mouse #</b> | <b>GFP<br/>CFU</b> | <b>TOTAL<br/>CFU</b> | <b>GFP%</b>  |
| <b>1</b>          | <b>11</b>      | 2.50E+06           | 9.00E+06             | 27.78        |
|                   | <b>12</b>      | 9.00E+06           | 2.00E+07             | 45.00        |
|                   | <b>13</b>      | 1.20E+07           | 2.95E+07             | 40.68        |
|                   | <b>14</b>      | 2.50E+06           | 6.00E+06             | 41.67        |
|                   | <b>15</b>      | 1.50E+06           | 6.00E+06             | 25.00        |
|                   | <b>16</b>      | 5.00E+05           | 2.50E+06             | 20.00        |
| <b>2</b>          | <b>19</b>      | 4.00E+06           | 9.50E+06             | 42.11        |
|                   | <b>20</b>      | 5.00E+05           | 3.00E+06             | 16.67        |
|                   | <b>21</b>      | 1.00E+05           | 3.00E+05             | 33.33        |
|                   | <b>22</b>      | 1.40E+07           | 3.00E+07             | 46.67        |
|                   | <b>23</b>      | 3.50E+06           | 1.90E+07             | 18.42        |
| <b>3</b>          | <b>14</b>      | 2.00E+05           | 4.50E+05             | 44.44        |
|                   | <b>16</b>      | 3.50E+04           | 7.50E+04             | 46.67        |
|                   | <b>17</b>      | 4.00E+04           | 1.90E+05             | 21.05        |
|                   | <b>18</b>      | 1.50E+03           | 5.00E+03             | 30.00        |
|                   | <b>19</b>      | 1.50E+04           | 5.00E+04             | 30.00        |
|                   | <b>Mean</b>    | <b>3.15E+06</b>    | <b>8.47E+06</b>      | <b>33.09</b> |
|                   | <b>SD</b>      | <b>4.52E+06</b>    | <b>1.05E+07</b>      | <b>10.85</b> |
| <b>DB121::aph</b> | <b>Mouse #</b> | <b>GFP<br/>CFU</b> | <b>TOTAL<br/>CFU</b> | <b>GFP%</b>  |
| <b>1</b>          | <b>1</b>       | 5.00E+05           | 7.00E+06             | 7.14         |
|                   | <b>2</b>       | 2.00E+05           | 1.50E+06             | 13.33        |
|                   | <b>3</b>       | 2.00E+05           | 1.90E+06             | 10.53        |
|                   | <b>4</b>       | 5.00E+04           | 1.00E+06             | 5.00         |
|                   | <b>5</b>       | 2.50E+06           | 2.00E+07             | 12.50        |
| <b>2</b>          | <b>1</b>       | 5.00E+04           | 1.40E+06             | 3.57         |

|                  | <b>2</b>       | 2.00E+05           | 1.05E+06             | 19.05        |
|------------------|----------------|--------------------|----------------------|--------------|
|                  | <b>3</b>       | 2.00E+04           | 1.05E+05             | 19.05        |
|                  | <b>4</b>       | 5.00E+06           | 2.70E+07             | 18.52        |
|                  | <b>5</b>       | 5.00E+04           | 9.00E+05             | 5.56         |
|                  | <b>6</b>       | 1.50E+04           | 1.05E+05             | 14.29        |
| <b>3</b>         | <b>1</b>       | 5.00E+05           | 6.50E+06             | 7.69         |
|                  | <b>3</b>       | 5.00E+05           | 9.00E+06             | 5.56         |
|                  | <b>4</b>       | 1.00E+06           | 5.50E+06             | 18.18        |
|                  | <b>Mean</b>    | <b>7.70E+05</b>    | <b>5.93E+06</b>      | <b>11.43</b> |
|                  | <b>SD</b>      | <b>1.38E+06</b>    | <b>8.09E+06</b>      | <b>5.75</b>  |
| <b>Mupirocin</b> | <b>Mouse #</b> | <b>GFP<br/>CFU</b> | <b>TOTAL<br/>CFU</b> | <b>GFP%</b>  |
| <b>1</b>         | <b>6</b>       | 2.00E+05           | 4.50E+05             | 44.44        |
|                  | <b>7</b>       | 2.00E+04           | 8.00E+04             | 25.00        |
|                  | <b>8</b>       | 3.00E+04           | 9.50E+04             | 31.58        |
|                  | <b>9</b>       | 1.00E+03           | 4.00E+03             | 25.00        |
|                  | <b>10</b>      | <500               | <500                 |              |
| <b>2</b>         | <b>7</b>       | <500               | <500                 |              |
|                  | <b>8</b>       | 5.00E+03           | 2.00E+04             | 25.00        |
|                  | <b>9</b>       | 2.00E+06           | 1.15E+07             | 17.39        |
|                  | <b>10</b>      | <500               | <500                 |              |
|                  | <b>11</b>      | <500               | <500                 |              |
| <b>3</b>         | <b>8</b>       | <500               | <500                 |              |
|                  | <b>9</b>       | 2.00E+03           | 6.50E+03             | 30.77        |
|                  | <b>10</b>      | 1.50E+03           | 5.00E+03             | 30.00        |
|                  | <b>11</b>      | 1.50E+04           | 3.00E+04             | 50.00        |
|                  | <b>12</b>      | 4.50E+04           | 8.00E+04             | 56.25        |
|                  | <b>13</b>      | <500               | <500                 |              |
|                  | <b>Mean*</b>   | <b>2.32E+05</b>    | <b>1.23E+06</b>      | <b>33.54</b> |
|                  | <b>SD*</b>     | <b>6.24E+05</b>    | <b>3.61E+06</b>      | <b>12.51</b> |

\* Mean and StDev calculated using only values above the limit of detection of the assay (500 cfus)



**Supplementary Table 2.** Spacers used in this study.

| Target | Spacer sequence (5'-3')         |
|--------|---------------------------------|
| aph    | TCATGAGTGAGGCCGATGGCGTCCTTTGCT  |
| mecA   | TTTTGAGTTGAACCTGGTGAAGTTGTAATC  |
| mecA2  | CATTTTCTTTGCTAGAGTAGCACTCGAATT  |
| sek    | GATTATCAATTCCTATATCACCTTGAGCGC  |
| pUSA01 | CTTATGTAACCTCAAATAGCCTTCATCAGT  |
| pUSA02 | AGGAGTAGTATTTAAAATGATTTGCAATATC |

**Supplementary Table 3.** Oligonucleotides used in this study.

| Number | Sequence (5'-3')                                         |
|--------|----------------------------------------------------------|
| B113   | ATTATAAAAGCCAGTCATTAGGCCTA                               |
| B127   | AAAAGCATGCAAATATGAGCCAAATAAATATATTC                      |
| B233   | TACTGGTACCTTTAAAAGCTTCTGTAGGTTTTTAG                      |
| B234   | TTTAGGTACCAAGAGCGAGAGATAGAGATATTAAG                      |
| B235   | TTTAGCATGCCTATAATCCTAGAGATTTTATTGTGT                     |
| B333   | CTTTATCCAATTTTCGTTTGAACCAACAAGTCTCAGTGTGCTG              |
| B334   | ACACTGAGACTTGTTGAGTTCAAACGAAAATTGGATAAAGTGGG             |
| B351   | ATCGTTTATCGTCGTCATCACAATAACTTTTAAAGATCTTGATAATTCACGCTGAC |
| B628   | AGTGGGAAACAACGCCCATGGAG                                  |
| B629   | GTTGAACGCATAAATCCAACAAG                                  |
| B632   | AGTCACCTCAAGTAAAGAGGTAA                                  |
| B633   | TGAAGGACCTAACCCCTTCACCTA                                 |
| L316   | TTAAGGGTTCTTCTCAACGCAC                                   |
| L318   | TTAAAAGTTATTGTGATGACGACG                                 |
| L362   | aaactcgtgGATTCTGTGATTTGGATCCTTCC                         |
| L409   | CGTGGTAAATCGGATAACGTTCCAAGTGAAG                          |
| L410   | CTTCACTTGGAACGTTATCCGATTTACCACG                          |
| L482   | aaaCTCGAGCTGAGAGTGCACCATATGCGG                           |
| L483   | aaaCTCGAGCTTAATAGCTCACGCTATGCCG                          |
| L484   | aaaCTCGAGCGCGCAAGCTGGGGATCCG                             |
| L485   | aaaCTCGAGTAGGTACTAAAACAATTCATCCAG                        |
| W270   | aaaaagatctTGCATAATTCACGCTGACCTC                          |
| W278   | aaaaagatctTATGACTGTTATGTGGTTATCG                         |
| W282   | aaaacacgagCGTTTGTGAACTAATGGGTGC                          |
